# Supplementary material
Source: PubMed Central journal article supplement (PMC4078882)

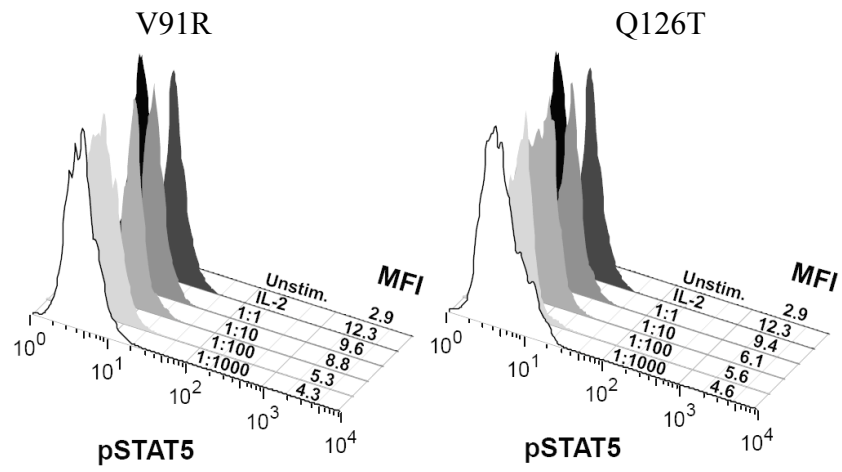

Supplement: NIHMS139439-supplement-1.pdf [file NIHMS139439-supplement-1.pdf]

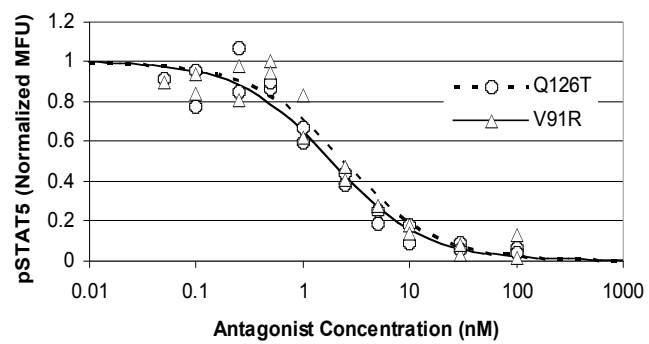

Supplement: NIHMS139439-supplement-2.pdf [file NIHMS139439-supplement-2.pdf]
